# Supplementary material
Source: HighWire-hosted journal article supplement (http://www.jrheum.org/highwire/filestream/37595/field_highwire_adjunct_files/0/190512DataSuppl.pdf)
Supplement: 190512DataSuppl.pdf [file 190512DataSuppl.pdf]

## **ONLINE SUPPLEMENTARY DATA**

### **Supplementary Data 1. Literature review search strategy**

Relevant literature was identified by conducting a targeted search of the medical literature available in PubMed. Broad searches were initially performed using “enthesitis” alone and in combination with several different terms, including “psoriatic arthritis,” “imaging,” “conventional radiography,” “ultrasound,” “magnetic resonance imaging,” “computed tomography,” “spectral computed tomography,” “scintigraphy,” “GRAPPA,” and “OMERACT.” Only English-language articles indexed in PubMed through December 2018 were included. Titles, abstracts, and full reports of the identified articles were screened for relevance. Additional articles were identified using terms such as “Leeds Enthesitis Index,” “Spondyloarthritis Consortium of Canada,” “Psoriatic Arthritis Magnetic Resonance Imaging Score,” “Glasgow Ultrasound Enthesis Scoring System,” “Spanish Enthesitis Index,” and “Madrid Sonographic Enthesitis Index” from the references cited in articles of interest and based on the authors’ knowledge of the published literature. Articles were considered relevant if they presented data on enthesitis in psoriatic arthritis or on imaging techniques used in its assessment.
